# Supplementary material for: Comparative Immunogenicity of BNT162b2 mRNA Vaccine with Natural SARS-CoV-2 Infection
Source: MDPI journal article supplement (doi:10.3390/vaccines9091017), 2021-09-13
Supplement: s1 [file s1]

**Supplementary Table S1. Median (25<sup>th</sup>-75<sup>th</sup>) levels of anti-SARS-CoV-2 RBD IgG by time (days) from 2<sup>nd</sup> dose of BNT162b2 vaccine**

|                              | N (%)      | Median (25th-75th) (AU/ml) | P <sup>a</sup> |
|------------------------------|------------|----------------------------|----------------|
| <b>Days from second dose</b> |            |                            | 0.007          |
| 5-7                          | 131 (15.0) | 15,107 (6,736 - 26,119)    |                |
| 8                            | 142 (16.3) | 16,503 (9,678 - 29,683)    |                |
| 9                            | 128 (14.7) | 17,514 (9,867 - 27,522)    |                |
| 10                           | 107 (12.3) | 17,081 (9,531 - 28,318)    |                |
| 11                           | 56 (6.4)   | 19,830 (13,525 - 30,796)   |                |
| 12                           | 88 (10.1)  | 15,229 (10,274 - 29,429)   |                |
| 13                           | 80 (9.2)   | 15,706 (8,557 - 23,497)    |                |
| 14                           | 92 (10.6)  | 12,462 (7,519 - 27,151)    |                |
| 15-17                        | 47 (5.4)   | 10,330 (5,529 - 18,880)    |                |

Abbreviations: 25th–75th, 25th and 75th percentiles; AU/ml, arbitrary units per milliliter

<sup>a</sup>Nonparametric Kruskal-Wallis test.

## **Figure Legends**

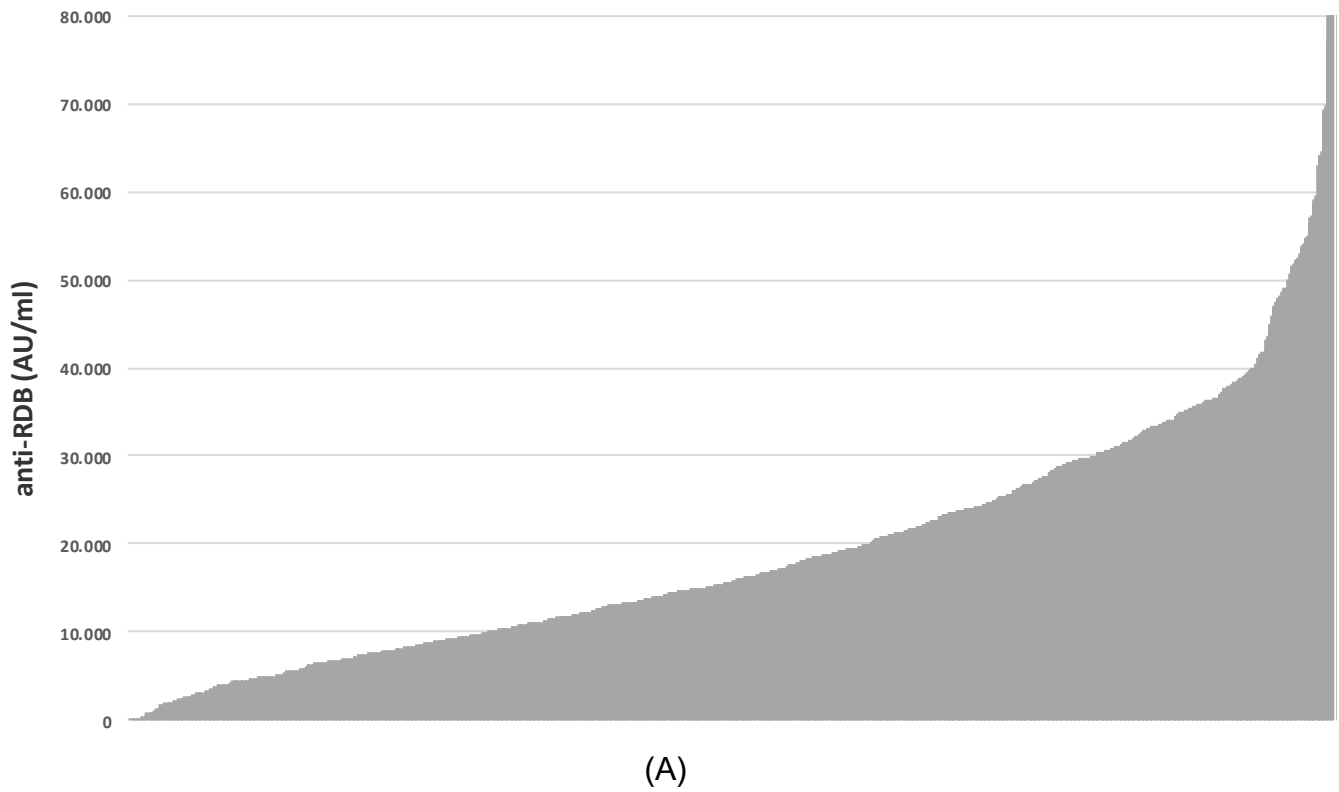

**Supplementary Figure S1A.** Cumulative distribution of anti-SARS-CoV-2 RBD AU/ml in vaccinated health care workers 5-17 days after the 2nd dose of BNT162b2.

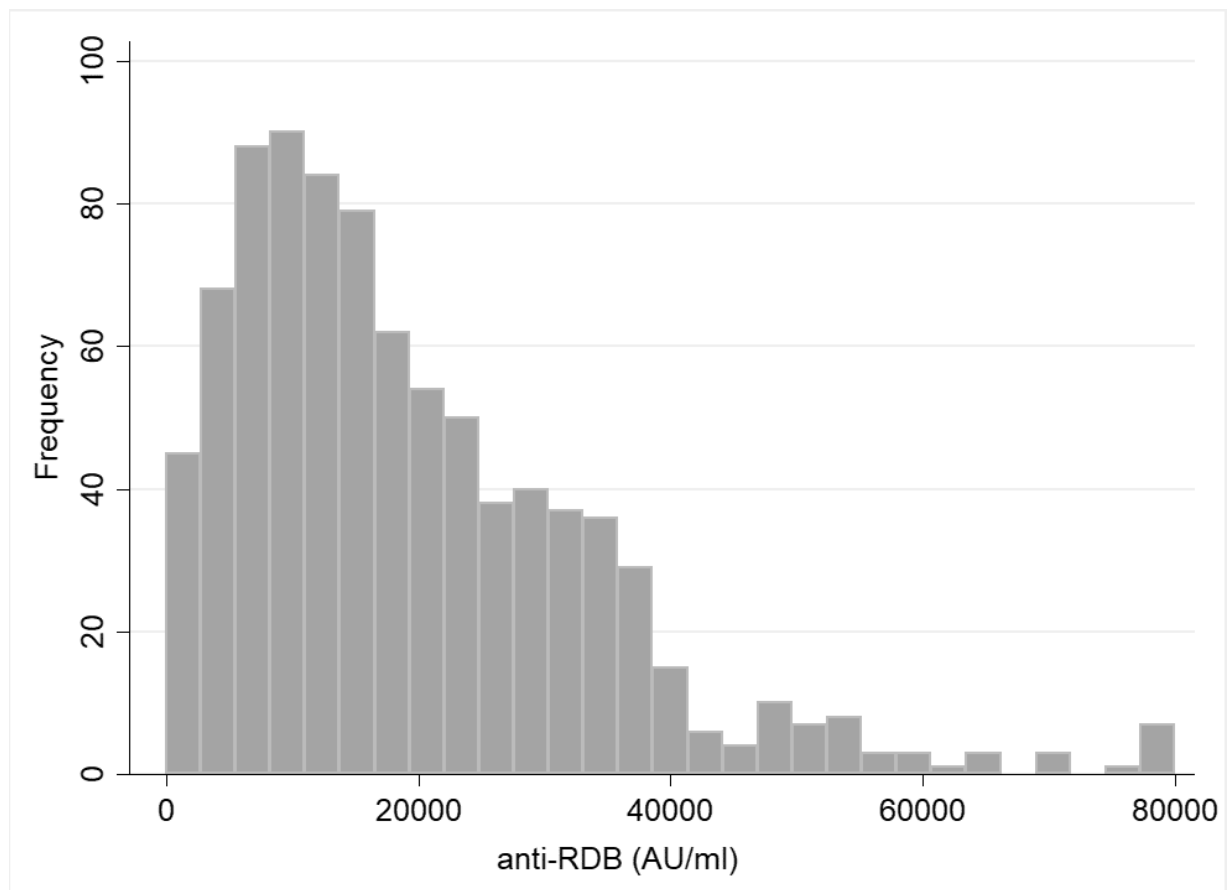

(B)

**Supplementary Figure S1B.** Frequency distribution of anti-SARS-CoV-2 RBD AU/ml in vaccinated health care workers 5-17 days after the 2nd dose of BNT162b2.
